# Supplementary material for: Influence of ylHog1 MAPK kinase on Yarrowia lipolytica stress response and erythritol production
Source: PubMed Central journal article supplement (PMC6170386; doi:10.1038/s41598-018-33168-6), 2018-10-03
Supplement: 41598_2018_33168_MOESM1_ESM.pdf [file 41598_2018_33168_MOESM1_ESM.pdf]

## **Influence of yIHog1 MAPK kinase on *Yarrowia lipolytica* stress response and erythritol production – Supplementary Information**

Dorota A. Rzechonek<sup>1</sup>, Alison M. Day<sup>2</sup>, Janet Quinn<sup>2</sup>, Aleksandra M. Mirończuk<sup>1\*</sup>

- 1) Wrocław University of Environmental and Life Sciences, Department of Biotechnology and Food Microbiology, Chełmońskiego 37, 51-630 Wrocław, Poland
- 2) Newcastle University, Institute for Cell and Molecular Biosciences, Framlington Place Newcastle upon Tyne NE2 4HH, United Kingdom

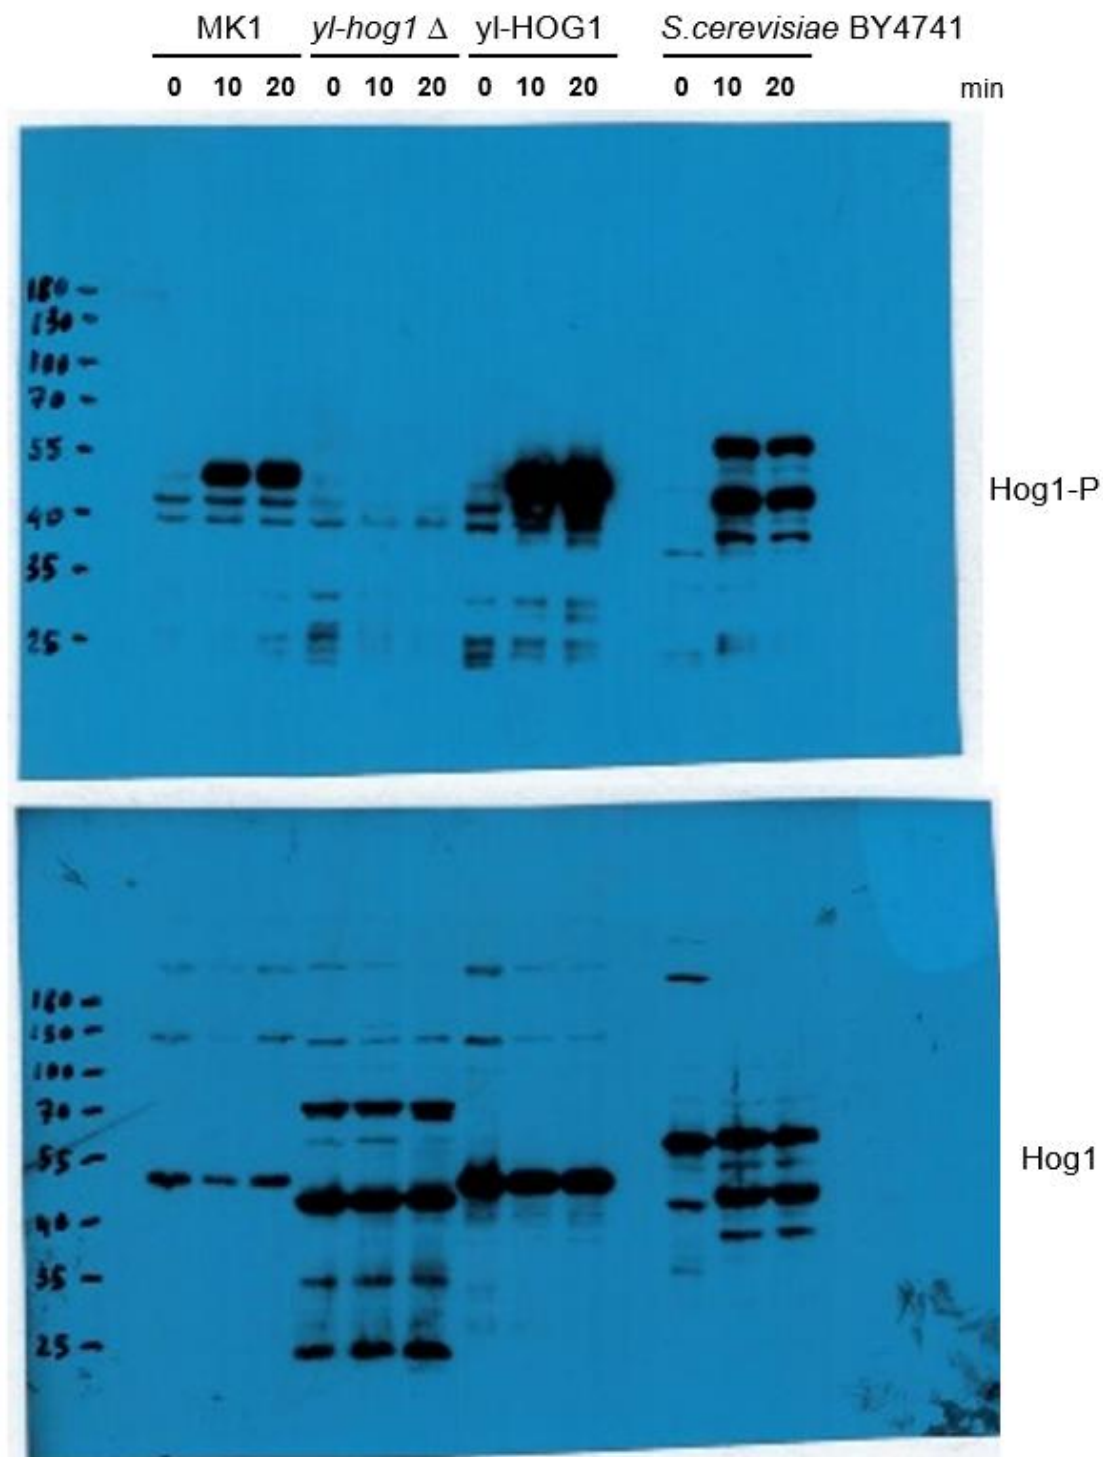

Fig 1 Western-blot analysis of whole cell extracts isolated from *Y. lipolytica* wild type (MK1), *yl-hog1*Δ and *yl-HOG1* cells after treatment with 1M NaCl for the specified times. The active form of protein (Hog1-P) was detected using an anti-phospho p38 antibody (upper panel).

Total levels of *yl-Hog1* protein were determined by probing the blot with an anti-Hog1 antibody (lower panel). *S. cerevisiae* BY4741 was used as a positive control and was processed parallel to *Y. lipolytica* samples. *S. cerevisiae* Hog1 is bigger than *Y. lipolytica* homologue and is visible as the upper band. Unspecific lower band might be a result of optimisation of protocol for *Y. lipolytica*.

PageRuler™ Prestained Protein Ladder, 10 to 180 kDa was used as a marker. The bands of marker were visible on membrane blot, and copied manually on the photographic film.
